# Supplementary material
Source: PubMed Central journal article supplement (PMC5016674)
Supplement: 10.1074_M116.725069_jbc.M116.725069-1.pdf [file 10.1074_M116.725069_jbc.M116.725069-1.pdf]

**Supplemental Table S1.** Summary of BLAST searches to identify mitochondrial import proteins in *T. gondii*.

| <i>S. cerevisiae</i>            | <i>A. thaliana</i>     | <i>T. brucei</i> | <i>T. gondii</i>           | E- value              |
|---------------------------------|------------------------|------------------|----------------------------|-----------------------|
| <b>TOM COMPLEX</b>              |                        |                  |                            |                       |
| Tom40                           | <i>AtTom40</i>         | None             | TGME49_218280              | 3.0 x e <sup>-5</sup> |
| Tom70                           | None                   | None             | None <sup>1</sup>          | N/A                   |
| Tom20                           | None                   | None             | None                       | N/A                   |
| Tom22                           | <i>AtTom22'</i> (Tom9) | None             | TGME49_255245              | 6.3 x e <sup>-4</sup> |
| Tom5                            | None                   | None             | None                       | N/A                   |
| Tom6                            | None                   | None             | None                       | N/A                   |
| Tom7                            | <i>AtTom7</i>          | None             | None                       | N/A                   |
| None                            | <i>AtTom6.0</i>        | None             | None                       | N/A                   |
| None                            | <i>AtTom6.3</i>        | None             | None                       | N/A                   |
| None                            | <i>AtTom20</i>         | None             | None                       | N/A                   |
| None                            | None                   | Atom40           | None                       | N/A                   |
| None                            | None                   | Atom69           | None                       | N/A                   |
| None                            | None                   | Atom46           | None                       | N/A                   |
| None                            | None                   | Atom36           | None                       | N/A                   |
| None                            | None                   | Atom14           | None                       | N/A                   |
| None                            | None                   | Atom12           | None                       | N/A                   |
| None                            | None                   | Atom11           | None                       | N/A                   |
| <b>OUTER MEMBRANE INSERTASE</b> |                        |                  |                            |                       |
| Sam50                           | <i>AtOmp85</i>         | <i>TbSam50</i>   | TGME49_205570 <sup>2</sup> | 5.0 x e <sup>-6</sup> |
| Sam35                           | None                   | <i>TbSam35?</i>  | None                       | N/A                   |
| Sam37                           | None                   | None             | None                       | N/A                   |
| Mdm10                           | None                   | None             | None                       | N/A                   |

| <b>PRESEQUENCE TRANSLOCASE</b>  |                                                   |                                               |                                                 |                                                                     |
|---------------------------------|---------------------------------------------------|-----------------------------------------------|-------------------------------------------------|---------------------------------------------------------------------|
| Tim23                           | <i>AtTim23</i>                                    | None                                          | TGME49_214150                                   | $2.4 \times e^{-11}$                                                |
| Tim17                           | <i>AtTim17</i>                                    | <i>TbTim17</i>                                | TGME49_312220                                   | $1.7 \times e^{-33}$                                                |
| Tim50                           | <i>AtTim50</i>                                    | None                                          | TGME49_283590 <sup>3</sup>                      | $3.2 \times e^{-11}$                                                |
| Tim21                           | None                                              | None                                          | None                                            | N/A                                                                 |
| Mgr2                            | None                                              | None                                          | TGME49_316140                                   | $1.2 \times e^{-6}$                                                 |
| <b>PRESEQUENCE MOTOR</b>        |                                                   |                                               |                                                 |                                                                     |
| mtHsp70                         | <i>AtmtHsp70</i>                                  | <i>TgmtHsp70</i>                              | TGME49_251780                                   | $3.5 \times e^{-209}$                                               |
| Mge1                            | <i>AtGrpE</i>                                     | <i>TbGrpE</i>                                 | TGME49_265220                                   | $4.5 \times e^{-26}$                                                |
| Tim44                           | <i>AtTim44</i>                                    | None                                          | TGME49_227830                                   | $3.4 \times e^{-9}$                                                 |
| Pam18                           | <i>AtPam18</i>                                    | <i>TbPam18</i>                                | TGME49_202810                                   | $9.9 \times e^{-15}$                                                |
| Pam16                           | <i>AtPam16</i>                                    | <i>TbPam16</i>                                | TGME49_249910                                   | $6.0 \times e^{-6}$                                                 |
| <b>MIA COMPLEX</b>              |                                                   |                                               |                                                 |                                                                     |
| Mia40                           | <i>AtMia40</i>                                    | None                                          | None                                            | N/A                                                                 |
| Erv1                            | <i>AtErv1</i>                                     | <i>TbErv1</i>                                 | TGME49_210787<br>TGME49_288620<br>TGME49_232815 | $5.0 \times e^{-20}$<br>$2.5 \times e^{-18}$<br>$1.1 \times e^{-6}$ |
| <b>TIM22 complex</b>            |                                                   |                                               |                                                 |                                                                     |
| Tim22                           | <i>AtTim22</i>                                    | None                                          | TGME49_225710                                   | $7.3 \times e^{-18}$                                                |
| Tim54                           | None                                              | None                                          | None                                            | N/A                                                                 |
| Tim18                           | None                                              | None                                          | None                                            | N/A                                                                 |
| Sdh3                            | <i>AtSdh3</i>                                     | None                                          | None                                            | N/A                                                                 |
| <b>SMALL TIMS</b>               |                                                   |                                               |                                                 |                                                                     |
| Tim8, Tim9, Tim10, Tim12, Tim13 | <i>AtTim8, AtTim9,</i><br><i>AtTim10, AtTim13</i> | <i>TbTim9, TbTim10,</i><br><i>TbTim8-like</i> | TGME49_260850 <sup>4</sup><br>TGME49_215390     | $1.7 \times e^{-10}$<br>$2.8 \times e^{-10}$                        |

|                                                   |                                  |                                  |                            |                        |
|---------------------------------------------------|----------------------------------|----------------------------------|----------------------------|------------------------|
|                                                   |                                  |                                  | TGME49_227870              | 3.3 x e <sup>-7</sup>  |
|                                                   |                                  |                                  | TGME49_254610              | 8.1 x e <sup>-4</sup>  |
|                                                   |                                  |                                  | TGME49_274090              | 2.2 x e <sup>-2</sup>  |
| <b>PRESEQUENCE PEPTIDASE and other peptidases</b> |                                  |                                  |                            |                        |
| Mpp- $\alpha$                                     | <i>AtMpp-<math>\alpha</math></i> | <i>TbMpp-<math>\alpha</math></i> | TGME49_202680              | 4.8 x e <sup>-54</sup> |
| Mpp- $\beta$                                      | <i>AtMpp-<math>\beta</math></i>  | <i>TbMpp-<math>\beta</math></i>  | TGME49_236210              | 2.1 x e <sup>-85</sup> |
| Imp1                                              | <i>AtImp</i>                     | <i>TbImp</i>                     | TGME49_268910              | 6.1 x e <sup>-15</sup> |
| Oct1                                              | <i>AtOct1</i>                    | <i>TbOct1</i>                    | TGME49_272670              | 2.2 x e <sup>-24</sup> |
| Icp55                                             | <i>AtIcp55</i>                   | None                             | None                       | N/A                    |
| <b>OXA1 insertase</b>                             |                                  |                                  |                            |                        |
| Oxa1                                              | <i>AtOxa1</i>                    | <i>TbOxa1</i>                    | TGME49_312430 <sup>5</sup> | 4.3 x 10 <sup>-4</sup> |

<sup>1</sup>Top hits are to Sti1-like proteins that contain tetratricopeptide repeat domains.

<sup>2</sup>Identified in BLAST searches using *AtOmp85* as a query.

<sup>3</sup>Note that this is not the top hit in the *T. gondii* genome against *ScTim50*, but is the only protein identified in reciprocal BLAST searches (i.e. whose top hit is to *ScTim50* when querying the *S. cerevisiae* genome).

<sup>4</sup>BLAST scores based on searches using *ScTim10* as a query.

<sup>5</sup>Identified in BLAST searches using *AtOxa1* as a query.
